# Supplementary material
Source: HighWire-hosted journal article supplement (https://tsaco.bmj.com/content/4/1/e000291)
Supplement: inline-supplementary-material-1 [file inline-supplementary-material-1.docx]

| **Supplemental Table. Characteristics of 19,045 trauma patients directly transported from the scene** | | | | | |  |  |  |  |  |  |
| --- | --- | --- | --- | --- | --- | --- | --- | --- | --- | --- | --- |
| **Fiscal year** | **2007** | **2008** | **2009** | **2010** | **2011** | **2012** | **2013** | **2014** | **2015** | **2016** | P values |
| **Number of trauma patients** |  |  |  |  |  |  |  |  |  |  |  |
| All | 1492 | 1526 | 1658 | 1912 | 1851 | 1978 | 2163 | 2226 | 2138 | 2101 | <0.001 |
| NUH(%) | 92(6.2) | 89(5.8) | 70(4.2) | 127(6.6) | 145(7.8) | 149(7.5) | 159(7.4) | 138(6.2) | 126(5.9) | 119(5.7) | 0.673 |
| Non-NUH(%) | 1400(93.8) | 1437(94.2) | 1588(95.8) | 1785(93.4) | 1706(92.2) | 1829(92.5) | 2004(92.6) | 2088(93.8) | 2012(94.1) | 1982(94.3) |  |
|  |  |  |  |  |  |  |  |  |  |  |  |
| **Number of each injury** |  |  |  |  |  |  |  |  |  |  |  |
| Traumatic intracranial hemorrhage |  |  |  |  |  |  |  |  |  |  |  |
| All | 133 | 138 | 164 | 209 | 177 | 174 | 202 | 220 | 228 | 228 | <0.001 |
| NUH(%) | 15(11.3) | 22(15.9) | 14(8.5) | 28(13.4) | 25(14.1) | 31(20) | 39(19.3) | 22(10) | 23(10.1) | 21(9.2) | 0.340 |
| Non-NUH(%) | 118(88.7) | 116(84.1) | 150(91.5) | 181(86.6) | 152(85.9) | 143(80) | 163(80.7) | 198(90) | 205(89.9) | 207(90.8) |  |
| Cardiovascular and lung injury |  |  |  |  |  |  |  |  |  |  |  |
| All | 25 | 24 | 15 | 23 | 27 | 32 | 31 | 19 | 26 | 24 | 0.588 |
| NUH(%) | 4(16) | 5(20.8) | 2(13.3) | 6(26.1) | 4(14.8) | 13(40.6) | 9(29) | 8(42.1) | 10(38.5) | 7(29.2) | 0.042 |
| Non-NUH(%) | 21(84) | 19(79.2) | 13(86.7) | 17(73.9) | 23(85.2) | 19(59.4) | 22(71) | 11(57.9) | 16(61.5) | 17(70.8) |  |
| Abdominal organ injury |  |  |  |  |  |  |  |  |  |  |  |
| All | 9 | 8 | 7 | 10 | 12 | 16 | 11 | 15 | 5 | 16 | 0.221 |
| NUH(%) | 3(33.3) | 0(0) | 2(28.6) | 6(60) | 6(50) | 11(68.8) | 5(45.5) | 6(40) | 1(20) | 7(43.8) | 0.946 |
| Non-NUH(%) | 6(66.7) | 8(100) | 5(71.4) | 4(40) | 6(50) | 5(31.2) | 6(54.5) | 9(60) | 4(80) | 9(56.2) |  |
| Pelvic fracture |  |  |  |  |  |  |  |  |  |  |  |
| All | 64 | 62 | 76 | 76 | 81 | 70 | 95 | 100 | 121 | 117 | <0.001 |
| NUH(%) | 8(12.5) | 4(6.5) | 5(6.6) | 10(13.2) | 4(4.9) | 7(10) | 10(10.5) | 10(10) | 5(4.1) | 4(3.4) | 0.067 |
| Non-NUH(%) | 56(87.5) | 58(93.5) | 71(93.4) | 66(86.8) | 77(95.1) | 63(90) | 85(89.5) | 90(90) | 116(95.9) | 113(96.6) |  |
| Proximal femur fracture |  |  |  |  |  |  |  |  |  |  |  |
| All | 320 | 315 | 341 | 387 | 424 | 413 | 485 | 510 | 451 | 444 | 0.001 |
| NUH(%) | 1(0.3) | 3(1) | 1(0.3) | 6(1.6) | 5(1.2) | 2(0.5) | 8(1.6) | 8(1.6) | 6(1.3) | 1(0.2) | 0.450 |
| Non-NUH(%) | 319(99.7) | 312(99) | 340(99.7) | 381(98.4) | 419(98.8) | 411(99.5) | 477(98.4) | 502(98.4) | 445(98.7) | 443(99.8) |  |
| Other fractures |  |  |  |  |  |  |  |  |  |  |  |
| All | 888 | 928 | 1009 | 1164 | 1072 | 1248 | 1303 | 1296 | 1257 | 1244 | <0.001 |
| NUH(%) | 45(5.1) | 39(4.2) | 31(3.1) | 56(4.8) | 70(6.5) | 66(5.3) | 71(5.4) | 52(4) | 58(4.6) | 70(5.6) | 0.291 |
| Non-NUH(%) | 843(94.9) | 889(95.8) | 978(96.9) | 1108(95.2) | 1002(93.5) | 1182(94.7) | 1232(94.6) | 1244(96) | 1199(95.4) | 1174(94.4) |  |
| Severe multiple trauma |  |  |  |  |  |  |  |  |  |  |  |
| All | 22 | 25 | 24 | 17 | 22 | 19 | 12 | 23 | 20 | 9 | 0.060 |
| NUH(%) | 10(45.5) | 13(52) | 11(45.8) | 6(35.3) | 13(59.1) | 11(57.9) | 7(58.3) | 12(52.2) | 12(60) | 6(66.7) | 0.332 |
| Non-NUH(%) | 12(54.5) | 12(48) | 13(54.2) | 11(64.7) | 9(40.9) | 8(42.1) | 5(41.7) | 11(47.8) | 8(40) | 3(33.3) |  |
| Spinal cord injury |  |  |  |  |  |  |  |  |  |  |  |
| All | 31 | 26 | 22 | 26 | 36 | 25 | 24 | 43 | 30 | 19 | 0.955 |
| NUH(%) | 6(19.4) | 3(11.5) | 4(18.2) | 9(34.6) | 18(50) | 8(32) | 10(41.7) | 20(46.5) | 11(36.7) | 3(15.8) | 0.067 |
| Non-NUH(%) | 25(80.6) | 23(88.5) | 18(81.8) | 17(65.4) | 18(50) | 17(68) | 14(58.3) | 23(53.5) | 19(63.3) | 16(84.2) |  |
|  |  |  |  |  |  |  |  |  |  |  |  |
| **Age(years), mean(SD)** | 66.7(22.4) | 66.9(22.0) | 67.9(21.8) | 69.2(21.1) | 70.4(20.8) | 70.2(21.2) | 70.6(21.3) | 72.4(19.7) | 71.8(20.4) | 72.5(20.6) | <0.001 |
| Age 0-14yrs | 30 | 42 | 35 | 45 | 40 | 47 | 48 | 34 | 40 | 43 | 0.312 |
| Age 15-64yrs | 492 | 479 | 509 | 534 | 523 | 529 | 537 | 534 | 502 | 466 | 0.893 |
| Age >64yrs | 970 | 1005 | 1114 | 1333 | 1288 | 1402 | 1578 | 1658 | 1598 | 1592 | <0.001 |
|  |  |  |  |  |  |  |  |  |  |  |  |
| **Sex** |  |  |  |  |  |  |  |  |  |  |  |
| Male | 639 | 665 | 693 | 784 | 728 | 799 | 864 | 868 | 841 | 798 | 0.002 |
| Female | 853 | 861 | 965 | 1128 | 1123 | 1179 | 1299 | 1358 | 1297 | 1303 | < 0.001 |
|  |  |  |  |  |  |  |  |  |  |  |  |
| **Time from emergency call to arrival at the scene(min), mean(SD)** | 7.0(4.1) | 7.0(4.1) | 8.5(4.4) | 8.4(4.2) | 8.9(4.5) | 8.9(4.1) | 8.9(4.3) | 9.1(4.2) | 9.5(4.3) | 9.4(4.2) | <0.001 |
| **Time from emergency call to hospital arrival (min), mean(SD)** | 32.5(12.5) | 33.1(12.6) | 35.4(12.8) | 35.1(13.2) | 37.2(12.9) | 37.8(12.4) | 38.8(13.0) | 39.2(13.0) | 41.0(13.6) | 40.7(12.1) | <0.001 |
| NUH, transported to Nagasaki University Hospital; non-NUH, not transported to NUH. | | | | |  |  |  |  |  |  |  |
